# Supplementary material for: Estrogen-induced FXR1 promotes endocrine resistance and bone metastasis in breast cancer via BCL2 and GPX4
Source: Front Cell Dev Biol. 2025 Mar 24;13:1563353. doi: 10.3389/fcell.2025.1563353 (PMC11973456; doi:10.3389/fcell.2025.1563353)
Supplement: Supplementary file 2 [file Table1.xlsx]

## Sheet: Primer information
Supplementary Table 1. List of primer,antibody and reagent information. (Primer)
shRNA Primers	Sequence
FXR1 shRNA-1	CCGGGCGAAGTATTCGTACGAAGTTCTCGAGAACTTCGTACGAATACTTCGCTTTTTTG
FXR1 shRNA-2	CCGGCGCCAGGTTCCATTTAATGAACTCGAGTTCATTAAATGGAACCTGGCGTTTTTTG
ESR1 shRNA-1	CCGGCTACAGGCCAAATTCAGATAACTCGAGTTATCTGAATTTGGCCTGTAGTTTTT
ESR1 shRNA-2	CCGGCTCTACTTCATCGCATTCCTTCTCGAGAAGGAATGCGATGAAGTAGAGTTTTT
EIF4E shRNA-1	CCGGCCACTCTGTAATAGTTCAGTACTCGAGTACTGAACTATTACAGAGTGGTTTTTG
EIF4E shRNA-2	CCGGCCAAAGATAGTGATTGGTTATCTCGAGATAACCAATCACTATCTTTGGTTTTTG
GPX4 shRNA-1	CCGGGTGGATGAAGATCCAACCCAACTCGAGTTGGGTTGGATCTTCATCCACTTTTTG
GPX4 shRNA-2	CCGGGCACATGGTTAACCTGGACAACTCGAGTTGTCCAGGTTAACCATGTGCTTTTTG
IGF1R shRNA-1	CGGCAACCTGAGTTACTACATCTCGAGATGTAGTAACTCAGGTTGCCGTTTTTG
IGF1R shRNA-2	CCGGGCCGAAGATTTCACAGTCAAACTCGAGTTTGACTGTGAAATCTTCGGCTTTTTG
CRISPR Primers	Sequence
FXR1-sg1	FW：TGTTCCTGAGGATTTGAGAG
	Rev：CTCTCAAATCCTCAGGAACAC
FXR1-sg2	FW：TACCTTCTTTAAATGCACAG
	Rev：CTGTGCATTTAAAGAAGGTAC
RT-qPCR Primers	Sequence
FXR1	FW：GTTCCAACATGGCGGAGCTG
	Rev：AGGGAGTCTTCATGAACATC
ESR1	FW：CCCACTCAACAGCGTGTCTC
	Rev：CGTCGATTATCTGAATTTGGCCT
GPX4	FW：GAGGCAAGACCGAAGTAAACTAC
	Rev：CCGAACTGGTTACACGGGAA
EIF4E	FW：GAAACCACCCCTACTCCTAATCC
	Rev：AGAGTGCCCATCTGTTCTGTA
GAPDH	FW：TGCACCACCAACTGCTTAGC
	Rev：GGCATGGACTGTGGTCATGAG
TFF1	FW：ATACCATCGACGTCCCTCCA
	Rev：AAGCGTGTCTGAGGTGTCCG
GREB1	FW：ATGGGAAATTCTTACGCTGGAC
	Rev：CACTCGGCTACCACCTTCT
STMN3	FW：CCAGCACCATTTCCGCCTA
	Rev：TGCGGCTGTGTGTAGAAGC
NELL2	FW：GGGGCTGCATAATGGGACG
	Rev：CAGTCTGACTTCATTCCGATGG
KITLG	FW：AATCCTCTCGTCAAAACTGAAGG
	Rev：CCATCTCGCTTATCCAACAATGA
PCDH19	FW：CCAAGTGCATCATCTCGCTC
	Rev：CCATCTCGCTTATCCAACAATGA
BCL2	FW：TATCCAATCCTGTGCTGCTA
	Rev：ATACTCTGTGAATCCCGTTT
BCL2 pre-mRNA	FW：CACGTAAAGAGGGTCTCA
	Rev：GTTGACTTCACTTGTGGC
BCL2 Maturation	FW：GGAAGTTTCAAATCAGCTA
	Rev：CTTGATTCTGGTGTTTCCCC
CCDC170	FW：GCTCAGTGCTGTAGAAGCAAA
	Rev：TTGTGAGGTTGTGACTGCATC
DACH1	FW：ATGTGGAACAAGTTCGCATCC
	Rev：TGCAGTCATTGTAGAGGGTCT
ERBB4	FW：GTCCAGCCCAGCGATTCTC
	Rev：AGAGCCACTAACACGTAGCCT
GFRA1	FW：CCAAAGGGAACAACTGCCTG
	Rev：CGGTTGCAGACATCGTTGGA
ZNF664	FW：ACCCAGCAGGATCCTAAGGC
	Rev：TCTTGGATTTGCAGGTCACAGT
CANX	FW：TCCATGACAAGACCCCTTATACG
	Rev：ACCACAGATTGGTCAACCAGTA
BCAT2	FW：GCTCAACATGGACCGGATG
	Rev：CCGCACATAGAGGCTGG
SUCLA2	FW：GCTGCCTAGTAAATGGTGCTG
	Rev：GTTGACCAGAATAGCCAGTACC
ATG13	FW：TTGCTATAACTAGGGTGACACCA
	Rev：CCCAACACGAACTGTCTGGA
MEIS3	FW：ATGGCCCGGAGGTATGATGA
	Rev：GAAGAGCGGGTGTCCATAGA
ELOVL2	FW：ATGTTTGGACCGCGAGATTCT
	Rev：CCCAGCCATATTGAGAGCAGATA
SARAF	FW：TACCCTCCACTATGACCGCTA
	Rev：TCCGTCTTACATTCCCACTGT
ADAMTS19	FW：AGGCCAGTAACTGCTTGCTAC
	Rev：GTCTAGCTTGGTTCTGCATTCTT
KITLG	FW：AATCCTCTCGTCAAAACTGAAGG
	Rev：CCATCTCGCTTATCCAACAATGA
TMTC3	FW：GGTGTGGTTACTGCCTGCTAT
	Rev：GGACGGTAAGACTTGTGGCT
MALRD1	FW：TGCCTCCTGACAGCATTTGT
	Rev：TCTTTCATAATTCAAACAGTGCCG
ZBTB10	FW：CGGCTCCACGAACAATAACG
	Rev：CAGGCCCTCCAATTCCACTT
RAMP1	FW：CCAGGAGGCTAACTACGGTG
	Rev：GGGACCACGATGAAGGGGTA
MAPK8IP2	FW：GCGCATGATCTCGTCCATCTC
	Rev：CCGACTCGTACTCGCTGTTG
PCR Primers	Sequence
Flag FL	FW：ATGGCGGAGCTGA
	Rev：TTATGAAACACCATTCAG
Flag KH	FW：ATGGCGGAGCTGA
	Rev：TTACTTTAGATAGGC
Flag RGG	FW：GAAGTAGAACAGCTAAG
	Rev：TTATGAAACACCATTCAG
R-FXR1	FW：AGGCAAGTCCCTTTCAACGAGGTTAGATTACC
	Rev： CGTTGAAAGGGACTTGCCTTTCTGGTTGCCAA
ESR1	FW：ATGACCATGACCCTCC
	Rev：TCAGACCGTGGCAGG
GPX4	FW：ATGAGCCTCGGCCGCCTTTGC
	Rev：CTAATTTGTCTGTTTATTCCC
BCL2	FW：ATGGCGCACGCTGGGA
	Rev：TCACTTGTGGCCCAG
GPX4 3’UTR	FW：CTCCACAAGTGTGTGGCC
	Rev：CTAATTTGTCTGTTTATTCC
GPX4 3’UTR mut	FW：CTCTTTAAAGCCTGCCTGCAAACC
	Rev：GGCTTTAAAGAGTGCCGGTGGAA

## Sheet: Antibody information
Supplementary Table 1. List of primer,antibody and reagent information.(Antibody )
Antibody	Producer	Catalog No.	Application
FXR1	Santa Cruz	sc-374148	WB、RIP
FXR1	Proteintech	13194-AP	WB、RIP、IHC
β-Actin	Santa Cruz	sc-8432	WB
ERα	Santa Cruz	sc-8005	WB
BCL2	Santa Cruz	sc-7382	WB、IHC
GPX4	Santa Cruz	sc-166570	WB、IHC
EIF4E	Santa Cruz	sc-9976	WB
EIF4EBP1	Santa Cruz	sc-9977	WB
p-EIF4EBP1	Santa Cruz	sc-293124	WB
Flag	Proteintech	66008-4-Ig	WB、RIP
p21	Santa Cruz	sc-397	WB
His	Proteintech	66005-1-Ig	WB
HRP-Secondary Antibody（Mouse）	Thermo Fisher	32230	WB
HRP-Secondary Antibody（Rabbit）	Thermo Fisher	32260	WB

## Sheet: Reagent information
Supplementary Table 1. List of primer,antibody and reagent information.(Reagent)
Reagent	Catalog No.	Producer
IGF1	abs04177	Absin
BODIPY 581/591 C11	D3861	Invitrogen
Fulvestrant	V900926	Sigma-Aldrich
Rapamycin	V900930
Actinomycin D	SBR00013
Estrogen	T1048	Targetmol
Tamoxifen	T6906
Picropodophyllin	T6943
Erastin	T1765
RSL3	T3646
Ferrostatin-1	T6500
Liproxstatin-1	T2376
Necrostatin-1	T1847
3-methyladenine	T1879
Z-VAD-FMK	T7020
Imidazole ketone erastin	T5523
